# Supplementary material
Source: Springer Nature journal article supplement (https://www.springermedizin.de/resource/supplementary/12913_2012_2518_MOESM1_ESM.pdf/9532102)

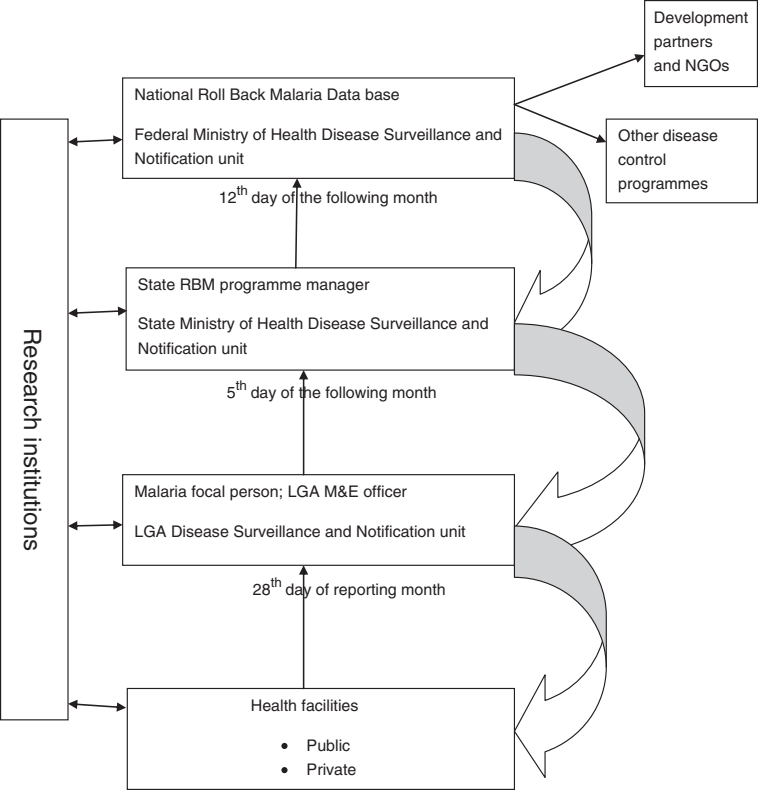

Supplement: MOESM1 [file 9532102]
